# Supplementary material for: First observations of ovary regeneration in an amphipod, Ampelisca eschrichtii Krøyer, 1842
Source: PeerJ. 2022 Mar 10;10:e12950. doi: 10.7717/peerj.12950 (PMC8918206; doi:10.7717/peerj.12950)
Supplement: Supplemental Information 4 — Bonferroni estimated significances of difference (non-overlapping lines) among average volumes (µm3) of eosinophilic (ec) and mesodermal (mc) cells in male and female A. eschrichtii with different reproductive statuses (ANOVA, p < 5.6E-20). (M_ibm) – ecs on the intestinal basal membrane of immature 13.5 mm male. (M_test) – mcs in the germinal zone of immature 13.5 mm male testes. (Fnorm_ibm) – ecs on the intestinal basal membrane in the anterior part of the body in a female with normal ovaries. (Fatr_imb) – ecs on the intestinal basal membrane in the anterior part of the body in a female with ovarian atrophy. (Freg_nest) – ecs in the “nests” on the intestinal basal membrane of a female with regenerating ovaries. (Freg_migr) – putatively migrating ecs outside the intestinal basal membrane in the female with regenerating ovaries. (Freg_gz) – mcs in the germinal zone of a female with regenerating ovaries. (Freg_ibm) – ecs on the intestinal basal membrane opposite the germinal zone in a female with regenerating ovaries. [file peerj-10-12950-s004.xlsx]

## Sheet: Raw_data
F0 13	F0 13	F0 13		F0 18	F0 18	F0 18		FII 24	FII 24	FII 24			male ibm	male ibm	male ibm		male testis	male testis	male testis		F0 anter	F0 anter	F0 anter		FII atroph	FII atroph	FII atroph		FIV nest	FIV nest	FIV nest		FIV ibm	FIV ibm	FIV ibm		FIV migr	FIV migr	FIV migr		FIV gz	FIV gz	FIV gz
R	r	V	V_est	R	r	V	V_est	R	r	V	est		R	r	V		R	r	V		R	r	V		R	r	V		R	r	V		R	r	V		R	r	V		R	r	V
6.75	4.05	462	463.77	5.15	3.45	255	256.764	5.15	3.9	327	328.114		4.45	4.4	360	360.873	5.75	4.6	508	509.65	7.21	4.5	610	611.574	3.64	3.58	195	195.414	10.07	6.8	1946	1950.45	11.35	7.2	2459	2464.62	9.6	8.85	3143	3149.53	11.3	9.35	4129	4138
6	4.55	519	520.311	6.5	3.9	413	414.125	4.9	4.7	452	453.399		4.9	3.45	244	244.3	5.25	4	351	351.858	5.41	4.81	523	524.295	4.37	3.64	242	242.534	6.84	5.84	975	977.171	12.15	8.61	3764	3772.86	10.05	9.75	3993	4001.88	11.6	7.85	2988	2994.24
6.7	4.7	618	619.954	6.55	3.95	427	428.079	4.85	4.8	467	468.072		4.7	3.9	299	299.444	5.1	3.85	316	316.651	4.71	3.8	284	284.89	4.61	3.72	266	267.224	9.75	6.15	1541	1544.7	11.4	8.9	3774	3782.45	11	8.8	3558	3568.18	12.25	7.55	2919	2924.95
5.55	5.2	627	628.62	8.1	4.2	597	598.511	6.2	4.95	635	636.342		3.55	2.55	96	96.6935	4.5	3.3	205	205.272	5.22	4.32	407	408.062	6.01	4.75	565	568.003	7.4	4.7	683	684.725	9	6.7	1689	1692.31	8.85	7.55	2108	2113.13	12.75	7.5	2996	3004.15
8.75	4.4	707	709.581	6.56	4.85	645	646.362	5.95	5.7	808	809.758		4.85	3.9	308	309.001	4.75	4.75	448	448.921	4.89	4.75	461	462.152	6.81	4.76	645	646.323	5.25	4.65	474	475.504	9.1	6.25	1485	1488.98	7.75	7.05	1610	1613.5	12.5	6.05	1912	1916.5
7.8	4.85	766	768.54	9.15	4.45	757	758.979						4.85	3.15	131	201.582	5.05	3.65	281	281.816	5.96	3.67	331	336.254	5.56	4.85	545	547.831	15.2	4.05	1041	1044.34	11.35	7.2	2459	2464.62	8.4	6.95	1695	1699.56	9.8	6	1474	1477.81
8.25	4.75	778	779.704	6	5.6	786	788.163						5.1	4.25	321	385.866	5.2	3.75	305	306.305	4.98	4.31	382	387.501	5.12	4.79	491	492.073	12	6.8	2318	2324.28	10	7.65	2446	2451.38	8.15	6.9	1622	1625.34	10.7	6.9	2129	2133.88
8.65	4.9	868	869.955	8.5	5.1	924	926.079						4.75	3.1	191	191.208	6.2	4.2	457	458.12	5.15	4.02	347	348.617	5.58	4.36	443	444.32	12.15	6.25	1983	1988.04	12	8.85	3928	3936.92	8.15	5	851	853.466	9.45	6.15	1494	1497.17
7.55	5.3	886	888.357	6.95	5.7	943	945.852						4.3	4.05	295	295.439	4.45	3.9	283	283.516	6.01	5.2	679	680.722	4.8	3.4	232	232.428	8	6.7	1500	1504.28	11.8	8.25	3357	3364.17	8.9	6.9	1771	1774.91
7.4	5.95	1094	1097.37	6.8	5.95	1006	1008.4						4.95	3.45	246	246.793	5.35	4.55	463	463.944	4.89	4.86	481	483.805	4.52	3.61	246	246.741	7.55	5.45	937	939.352	10.95	8.25	3115	3121.84	11.55	8.4	3406	3413.73
																					5.22	4.87	511	518.582	5.32	4.33	416	417.807	9.85	7.6	2377	2383.15	8.85	6.75	1685	1689.04
																					4.95	3.81	300	300.984	6.25	5.7	848	850.586	9.6	7.7	2378	2384.19	11.1	9.35	4056	4064.76
																					4.63	4.51	393	394.478	5.32	4.89	532	532.866	9.85	6.3	1633	1637.59	12	8.1	3291	3297.92
																					4.8	4.22	357	358.059	6.62	4.75	624	625.653	8.15	5.35	974	977.133	10.7	8.35	3118	3124.97
																					5.3	4.73	489	496.692	5.95	5.14	657	658.464	6.4	5.15	709	711.022	18.45	10.8	8995	9014.31
																					4.25	4.08	296	296.345	6	5.1	652	653.703	6.5	5.65	867	869.158	12.62	12.41	8124	8141.26
																					6.98	4.94	712	713.506	5.65	5.15	626	627.699					9.45	9.1	3271	3277.96
																					6.93	5.49	872	874.916	6.15	5.75	850	851.725
																					6.1	4.89	609	610.993	6.96	5.41	847	853.282
																					4.81	3.89	304	304.883	6.5	4.71	602	604.01

## Sheet: ANOVA Vol. Bonferroni
	Post-hoc tests of ANOVA based on Bonferroni correction of significance
	example:	https://www.youtube.com/watch?v=tPGPV_XPw-o
													1	2	3	4	5	6	7	8
Var 1	Var 2	Var 3											Var 6	Var 7	Var 8	Var 9	Var 10	Var 12	Var 13	Var 11
F0 _13	F0 _18	FII_24											male_bm	male_test	F0_anter	FII_atroph	FIV_nest	FIV_migr	FIV_gz	FIV_ibm
Var 1	Var 2	Var 3											Var 6	Var 7	Var 8	Var 9	Freq_nest	Freq_migr	Freq_gz	Freq_ibm
463.77	256.764	328.114											360.873	509.65	611.574	195.414	1950.45	3149.53	4138	2464.62
520.311	414.125	453.399											244.3	351.858	524.295	242.534	977.171	4001.88	2994.24	3772.86
619.954	428.079	468.072											299.444	316.651	284.89	267.224	1544.7	3568.18	2924.95	3782.45
628.62	598.511	636.342											96.6935	205.272	408.062	568.003	684.725	2113.13	3004.15	1692.31
709.581	646.362	809.758											309.001	448.921	462.152	646.323	475.504	1613.5	1916.5	1488.98
768.54	758.979												201.582	281.816	336.254	547.831	1044.34	1699.56	1477.81	2464.62
779.704	788.163												385.866	306.305	387.501	492.073	2324.28	1625.34	2133.88	2451.38
869.955	926.079												191.208	458.12	348.617	444.32	1988.04	853.466	1497.17	3936.92
888.357	945.852												295.439	283.516	680.722	232.428	1504.28	1774.91		3364.17
1097.37	1008.4												246.793	463.944	483.805	246.741	939.352	3413.73		3121.84
															518.582	417.807	2383.15			1689.04
															300.984	850.586	2384.19			4064.76
															394.478	532.866	1637.59			3297.92
															358.059	625.653	977.133			3124.97
															496.692	658.464	711.022			9014.31
															296.345	653.703	869.158			8141.26
															713.506	627.699				3277.96
															874.916	851.725
															610.993	853.282
															304.883	604.01
													263.12	362.605	469.865	527.934	1399.69	2381.32	2510.84	3597.08
An+A28:H91ova: Single Factor													Anova: Single Factor
SUMMARY													SUMMARY												t-Test: Two-Sample Assuming Equal Variances
Groups	Count	Sum	Average	Variance									Groups	Count	Sum	Average	Variance
Var 1	10	7346.16	734.616	35669.2									Var 6	10	2631.2	263.12	7374.23									Freq_migr	Freq_ibm
Var 2	10	6771.31	677.131	64220.6									Var 7	10	3626.05	362.605	10155.3								Mean	2381.32	3597.08
Var 3	5	2695.69	539.137	34904.1									Var 8	20	9397.31	469.865	26084.3								Variance	1.12119e+06	4.16751e+06
													Var 9	20	10558.7	527.934	43988.1								Observations	10	17
													Freq_nest	16	22395.1	1399.69	423043								Pooled Variance	3.07083e+06
ANOVA													Freq_ibm	17	61150.4	3597.08	4.16751e+06								Hypothesized Mean Difference	0
Source of Variation	SS	df	MS	F	P-value	F crit							Freq_migr	10	23813.2	2381.32	1.12119e+06								df	25
Between Groups	127727	2	63863.6	1.35275	0.279203	3.44336	NS						Freq_gz	8	20086.7	2510.84	840883								t Stat	-1.74085
Within Groups	1.03862e+06	22	47210.2																						P(T<=t) one-tail	0.0470028
																									t Critical one-tail	1.70814
Total	1.16635e+06	24											ANOVA												P(T<=t) two-tail	0.0940056		FALSE
													Source of Variation	SS	df	MS	F	P-value	F crit			Bonferroni significance			t Critical two-tail	2.05954
													Between Groups	1.57736e+08	7	2.25337e+07	25.6484	5.55036e-20	2.09975			0.00625
													Within Groups	9.04918e+07	103	878561
													Total	2.48228e+08	110
Average	734.616	677.131	539.137
STD	179.171	240.413	167.103
SEM	56.6589	76.0254	74.7306
N	10	10	5											Var 6	Var 7	Var 8	Var 9	Freq_nest	Freq_migr	Freq_gz	Freq_ibm					STD	N	SEM
													Cell Source	M_imb	M_test	Fnorm_ibm	Fatr_ibm	Freq_nest	Freq_migr	Freq_gz	Freq_ibm			M_imb	263.12	81.4666	10	25.762
													Ave. (µm3)	263.12	362.605	469.865	527.934	1399.69	2381.32	2510.84	3597.08			M_test	362.605	95.6022	10	30.2321
Bonferroni test is a type of multiple comparison test																								Fnorm_ibm	469.865	157.417	20	35.1995
																								Fatr_ibm	527.934	204.423	20	45.7103
																								Freq_nest	1399.69	629.764	16	157.441
t-Test: Two-Sample Assuming Equal Variances																								Freq_migr	2381.32	857.772	10	271.251
													STD	85.8733	100.774	161.506	209.733	650.418	1058.86	916.997	2041.45			Freq_gz	2510.84	900.107	8	318.236
	Var 1	Var 2											N	10	10	20	20	16	10	8	17			Freq_ibm	3597.08	1004.53	17	243.633
Mean	734.616	677.131		57.4854									SEM	27.1555	31.8674	36.1139	46.8978	162.604	334.842	324.207	495.124
Variance	35669.2	64220.6
Observations	10	10
Pooled Variance	49944.9
Hypothesized Mean Difference	0
df	18
t Stat	0.575171												t-Test: Two-Sample Assuming Equal Variances							t-Test: Two-Sample Assuming Equal Variances						t-Test: Two-Sample Assuming Equal Variances						t-Test: Two-Sample Assuming Equal Variances						t-Test: Two-Sample Assuming Equal Variances						t-Test: Two-Sample Assuming Equal Variances
P(T<=t) one-tail	0.286148
t Critical one-tail	1.73406													Var 6	Var 7						Var 7	Var 8					Var 8	Var 9					Var 9	Freq_nest					Freq_nest	Freq_migr					Freq_migr	Freq_ibm
P(T<=t) two-tail	0.572296			NS									Mean	263.12	362.605					Mean	362.605	469.865				Mean	469.865	527.934				Mean	527.934	1399.69				Mean	1399.69	2381.32				Mean	2381.32	3597.08
t Critical two-tail	2.10092												Variance	7374.23	10155.3					Variance	10155.3	26084.3				Variance	26084.3	43988.1				Variance	43988.1	423043				Variance	423043	1.12119e+06				Variance	1.12119e+06	4.16751e+06
													Observations	10	10					Observations	10	20				Observations	20	20				Observations	20	16				Observations	16	10				Observations	10	17
													Pooled Variance	8764.77						Pooled Variance	20964.3					Pooled Variance	35036.2					Pooled Variance	211218					Pooled Variance	684848					Pooled Variance	3.07083e+06
t-Test: Two-Sample Assuming Equal Variances													Hypothesized Mean Difference	0						Hypothesized Mean Difference	0					Hypothesized Mean Difference	0					Hypothesized Mean Difference	0					Hypothesized Mean Difference	0					Hypothesized Mean Difference	0
													df	18						df	28					df	38					df	34					df	24					df	25
	Var 1	Var 3											t Stat	-2.37615						t Stat	-1.91273					t Stat	-0.981035					t Stat	-5.65528					t Stat	-2.94255					t Stat	-1.74085
Mean	734.616	539.137		195.479									P(T<=t) one-tail	0.0144002						P(T<=t) one-tail	0.0330307					P(T<=t) one-tail	0.16639					P(T<=t) one-tail	1.20805e-06					P(T<=t) one-tail	0.00355521					P(T<=t) one-tail	0.0470028
Variance	35669.2	34904.1											t Critical one-tail	1.73406						t Critical one-tail	1.70113					t Critical one-tail	1.68595					t Critical one-tail	1.69092					t Critical one-tail	1.71088					t Critical one-tail	1.70814
Observations	10	5											P(T<=t) two-tail	0.0288005			FALSE			P(T<=t) two-tail	0.0660613		FALSE			P(T<=t) two-tail	0.33278		FALSE			P(T<=t) two-tail	2.4161e-06		TRUE			P(T<=t) two-tail	0.00711042		FALSE			P(T<=t) two-tail	0.0940056		FALSE
Pooled Variance	35433.8												t Critical two-tail	2.10092						t Critical two-tail	2.04841					t Critical two-tail	2.02439					t Critical two-tail	2.03224					t Critical two-tail	2.0639					t Critical two-tail	2.05954
Hypothesized Mean Difference	0
df	13																			t-Test: Two-Sample Assuming Equal Variances						t-Test: Two-Sample Assuming Equal Variances												t-Test: Two-Sample Assuming Equal Variances						t-Test: Two-Sample Assuming Equal Variances
t Stat	1.89597													Var 6	Var 8
P(T<=t) one-tail	0.0402054												Mean	263.12	469.865						Var 7	Var 9					Var 8	Freq_nest											Freq_nest	Freq_gz					Freq_migr	Freq_gz
t Critical one-tail	1.77093												Variance	7374.23	26084.3					Mean	362.605	527.934				Mean	469.865	1399.69										Mean	1399.69	2510.84				Mean	2381.32	2510.84
P(T<=t) two-tail	0.0804108			NS									Observations	10	20					Variance	10155.3	43988.1				Variance	26084.3	423043										Variance	423043	840883				Variance	1.12119e+06	840883
t Critical two-tail	2.16037												Pooled Variance	20070.3						Observations	10	20				Observations	20	16										Observations	16	8				Observations	10	8
													Hypothesized Mean Difference	0						Pooled Variance	33113.3					Pooled Variance	201213											Pooled Variance	555992					Pooled Variance	998556
t-Test: Two-Sample Assuming Equal Variances													df	28						Hypothesized Mean Difference	0					Hypothesized Mean Difference	0											Hypothesized Mean Difference	0					Hypothesized Mean Difference	0
													t Stat	-3.76802						df	28					df	34											df	22					df	16
	Var 2	Var 3											P(T<=t) one-tail	0.000389949						t Stat	-2.34586					t Stat	-6.18013											t Stat	-3.4414					t Stat	-0.273235
Mean	677.131	539.137		137.994									t Critical one-tail	1.70113						P(T<=t) one-tail	0.0131472					P(T<=t) one-tail	2.51577e-07											P(T<=t) one-tail	0.00116458					P(T<=t) one-tail	0.394084
Variance	64220.6	34904.1											P(T<=t) two-tail	0.000779897		TRUE				t Critical one-tail	1.70113					t Critical one-tail	1.69092											t Critical one-tail	1.71714					t Critical one-tail	1.74588
Observations	10	5											t Critical two-tail	2.04841						P(T<=t) two-tail	0.0262945		FALSE			P(T<=t) two-tail	5.03154e-07		TRUE									P(T<=t) two-tail	0.00232915		TRUE			P(T<=t) two-tail	0.788168		FALSE
Pooled Variance	55200.1																			t Critical two-tail	2.04841					t Critical two-tail	2.03224											t Critical two-tail	2.07387					t Critical two-tail	2.11991
Hypothesized Mean Difference	0
df	13																			t-Test: Two-Sample Assuming Equal Variances																								t-Test: Two-Sample Assuming Equal Variances
t Stat	1.07233
P(T<=t) one-tail	0.151537																				Var 7	Freq_nest																							Freq_migr	Freq_ibm
t Critical one-tail	1.77093																			Mean	362.605	1399.69																						Mean	2381.32	3597.08
P(T<=t) two-tail	0.303075			NS																Variance	10155.3	423043																						Variance	1.12119e+06	4.16751e+06
t Critical two-tail	2.16037																			Observations	10	16																						Observations	10	17
																				Pooled Variance	268210																							Pooled Variance	3.07083e+06
																				Hypothesized Mean Difference	0																							Hypothesized Mean Difference	0
																				df	24																							df	25
																				t Stat	-4.96765																							t Stat	-1.74085
																				P(T<=t) one-tail	2.25604e-05																							P(T<=t) one-tail	0.0470028
																				t Critical one-tail	1.71088																							t Critical one-tail	1.70814
																				P(T<=t) two-tail	4.51207e-05		TRUE																					P(T<=t) two-tail	0.0940056		FALSE
																				t Critical two-tail	2.0639																							t Critical two-tail	2.05954
[truncated: 9 more columns]

## Sheet: PAST
Cell volume	Reproductive status					https://www.nhm.uio.no/english/research/infrastructure/past/
360.873	M_imb		85.8733	Test for equal means								M_imb	M_test	Fnorm_ibm	Fatr_ibm	Freq_nest	Freq_ibm	Freq_migr	Freq_gz
244.3	M_imb		10								N	10	10	20	20	16	17	10	8				STD	N	SEM
299.444	M_imb		27.1555		Sum of sqrs	df	Mean square	F	p (same)		Min	96.6935	205.272	284.89	195.414	475.504	1488.98	853.466	1477.81		M_imb	263.12	81.4666	10	25.762
96.6935	M_imb			Between groups:	157736000	7	22533700	25.65	5.55e-20		Max	385.866	509.65	874.916	853.282	2384.19	9014.31	4001.88	4138		M_test	362.605	95.6022	10	30.2321
309.001	M_imb			Within groups:	90491800	103	878561	Permutation p (n=99999)			Sum	2631.2	3626.05	9397.31	10558.7	22395.1	61150.4	23813.2	20086.7		Fnorm_ibm	469.865	157.417	20	35.1995
201.582	M_imb			Total:	248228000	110	1e-05				Mean	263.12	362.605	469.865	527.934	1399.69	3597.08	2381.32	2510.84		Fatr_ibm	527.934	204.423	20	45.7103
385.866	M_imb										Std. error	27.1555	31.8674	36.1139	46.8978	162.604	495.124	334.842	324.207		Freq_nest	1399.69	629.764	16	157.441
191.208	M_imb			Components of variance (only for random effects):							Variance	7374.23	10155.3	26084.3	43988.1	423043	4167508	1121190	840883		Freq_migr	2381.32	857.772	10	271.251
295.439	M_imb			Var(group):	1585570	Var(error):	878561	ICC:	0.64346		Stand. dev	85.8733	100.774	161.506	209.733	650.418	2041.45	1058.86	916.997		Freq_gz	2510.84	900.107	8	318.236
246.793	M_imb										Median	271.115	334.255	435.107	557.917	1274.31	3277.96	1944.02	2529.42		Freq_ibm	3597.08	1004.53	17	243.633
509.65	M_test			omega2:	0.6085						25 prcntil	198.988	283.091	339.344	304.87	886.707	2458	1622.38	1602
351.858	M_test										75 prcntil	321.969	459.576	589.318	651.858	1978.64	3859.68	3452.34	3001.67
316.651	M_test			Levene´s test for homogeneity of variance, from means	p (same):	1.88e-07					Skewness	-0.496518	0.0734521	0.95224	-0.110632	0.321225	1.87367	0.289089	0.544616
205.272	M_test			Levene´s test, from medians	p (same):	1.53e-05					Kurtosis	0.212166	-1.33263	0.458082	-0.867886	-1.34782	3.36392	-1.41458	-0.297
448.921	M_test										Geom. mean	247.294	349.531	446.062	481.507	1252.59	3195.07	2158.01	2366.93
281.816	M_test			Welch F test in the case of unequal variances: F=25.16, df=37.79, p=2.194E-12							Coeff. var	32.6366	27.7915	34.3729	39.7272	46.4686	56.7529	44.4653	36.5216
306.305	M_test
458.12	M_test
283.516	M_test			Kruskal-Wallis test for equal medians							Bonferroni corrected p values
463.944	M_test											M_imb	M_test	Fnorm_ibm	Fatr_ibm	Freq_nest	Freq_ibm	Freq_migr	Freq_gz
611.574	Fnorm_ibm			H (chi2):	88.33						M_imb		1	0.01549	0.09626	0.000781	0.0006165	0.005115	0.01256
524.295	Fnorm_ibm			Hc (tie corrected):	88.33						M_test	1		1	1	0.0009839	0.0006165	0.005115	0.01256
284.89	Fnorm_ibm			p (same):	2.729e-16						Fnorm_ibm	0.01549	1		1	0.0001014	6.696e-06	0.0004111	0.001478
408.062	Fnorm_ibm										Fatr_ibm	0.09626	1	1		0.000216	6.696e-06	0.0003363	0.001478
462.152	Fnorm_ibm			There is a significant difference between sample medians							Freq_nest	0.000781	0.0009839	0.0001014	0.000216		0.0006459	0.8043	0.4359
336.254	Fnorm_ibm										Freq_ibm	0.0006165	0.0006165	6.696e-06	6.696e-06	0.0006459		1	1
387.501	Fnorm_ibm										Freq_migr	0.005115	0.005115	0.0004111	0.0003363	0.8043	1		1
348.617	Fnorm_ibm										Freq_gz	0.01256	0.01256	0.001478	0.001478	0.4359	1	1
680.722	Fnorm_ibm
483.805	Fnorm_ibm
518.582	Fnorm_ibm
300.984	Fnorm_ibm										Raw p values, sequential Bonferroni siginificance
394.478	Fnorm_ibm											M_imb	M_test	Fnorm_ibm	Fatr_ibm	Freq_nest	Freq_ibm	Freq_migr	Freq_gz
358.059	Fnorm_ibm										M_imb		0.0539	0.0005533	0.003438	2.789e-05	2.202e-05	0.0001827	0.0004487
496.692	Fnorm_ibm										M_test	FALSE		0.06789	0.05026	3.514e-05	2.202e-05	0.0001827	0.0004487
296.345	Fnorm_ibm										Fnorm_ibm	TRUE	FALSE		0.3648	3.62e-06	2.392e-07	1.468e-05	5.278e-05
713.506	Fnorm_ibm										Fatr_ibm	TRUE	FALSE	FALSE		7.716e-06	2.392e-07	1.201e-05	5.278e-05
874.916	Fnorm_ibm										Freq_nest	TRUE	TRUE	TRUE	TRUE		2.307e-05	0.02872	0.01557
610.993	Fnorm_ibm										Freq_ibm	TRUE	TRUE	TRUE	TRUE	TRUE		0.1385	0.1091
304.883	Fnorm_ibm										Freq_migr	TRUE	TRUE	TRUE	TRUE	FALSE	FALSE		0.9646
195.414	Fatr_ibm										Freq_gz	TRUE	TRUE	TRUE	TRUE	FALSE	FALSE	FALSE
242.534	Fatr_ibm
267.224	Fatr_ibm											0.00625
568.003	Fatr_ibm
646.323	Fatr_ibm
547.831	Fatr_ibm
492.073	Fatr_ibm
444.32	Fatr_ibm
232.428	Fatr_ibm
246.741	Fatr_ibm
417.807	Fatr_ibm
850.586	Fatr_ibm
532.866	Fatr_ibm
625.653	Fatr_ibm
658.464	Fatr_ibm
653.703	Fatr_ibm
627.699	Fatr_ibm
851.725	Fatr_ibm
853.282	Fatr_ibm
604.01	Fatr_ibm
1950.45	Freq_nest
977.171	Freq_nest
1544.7	Freq_nest
684.725	Freq_nest
475.504	Freq_nest
1044.34	Freq_nest
2324.28	Freq_nest
1988.04	Freq_nest
1504.28	Freq_nest
939.352	Freq_nest
2383.15	Freq_nest
2384.19	Freq_nest
1637.59	Freq_nest
977.133	Freq_nest
711.022	Freq_nest
869.158	Freq_nest
2464.62	Freq_ibm
3772.86	Freq_ibm
3782.45	Freq_ibm
1692.31	Freq_ibm
1488.98	Freq_ibm
2464.62	Freq_ibm
2451.38	Freq_ibm
3936.92	Freq_ibm
3364.17	Freq_ibm
3121.84	Freq_ibm
1689.04	Freq_ibm
4064.76	Freq_ibm
3297.92	Freq_ibm
3124.97	Freq_ibm
9014.31	Freq_ibm
8141.26	Freq_ibm
3277.96	Freq_ibm
3149.53	Freq_migr
4001.88	Freq_migr
3568.18	Freq_migr
2113.13	Freq_migr
1613.5	Freq_migr
1699.56	Freq_migr
1625.34	Freq_migr
853.466	Freq_migr
1774.91	Freq_migr
3413.73	Freq_migr
4138	Freq_gz
2994.24	Freq_gz
2924.95	Freq_gz
3004.15	Freq_gz
1916.5	Freq_gz
1477.81	Freq_gz
2133.88	Freq_gz
1497.17	Freq_gz

## Sheet: Stat & Graphs
					6	7	8	9	10	13	12	11
Rank	1	2	3		6	7	8	9	10	11	12	13
	F0_13	FII_18	FIV_24		male_bm	male_test	F0_anter	FII_atroph	FIV_nest	FIV_ibm	FIV_migr	FIV_gz
Maximum	1097.37	1008.4	809.76		385.87	509.65	874.92	853.28	2384.19	9014.31	4001.88	4138
Upper Quartile	874.56	931.023	723.05		321.967	459.575	589.317	651.855	1978.64	3859.68	3452.34	3001.67
Mean	734.616	677.13	539.136		263.119	362.606	469.865	527.933	1399.69	3597.08	2381.32	2510.84
Median	739.06	702.67	468.07		271.115	334.255	435.105	557.915	1274.31	3277.96	1944.02	2529.41
Lower Quartile	595.04	424.59	390.755		198.988	283.095	339.342	304.868	886.707	2458	1622.38	1602
Minimum	463.77	256.76	328.11		96.69	205.27	284.89	195.41	475.5	1488.98	853.47	1477.81
N	10	10	5		10	10	20	20	16	17	10	8
	Fimm_13	Fimm_18	Fatr_24		M_imb	M_test	Fnorm_ibm	Fatr_ibm	Freg_nest	Freg_ibm	Freg_migr	Freg_gz
